# Supplementary material for: Connecting biodiversity and potential functional role in modern euxinic environments by microbial metagenomics
Source: PubMed Central journal article supplement — ISME J. 2015 Jan 9;9(7):1648–61. doi: 10.1038/ismej.2014.254 (PMC4478705; doi:10.1038/ismej.2014.254), 2015-01-09
Supplement: ismej2014254x2.pdf [file ismej2014254x2.pdf]

| Cycle                                                  | Step                                                                                                                                                                         | KEGG                                                    | Gene                                                                   |
|--------------------------------------------------------|------------------------------------------------------------------------------------------------------------------------------------------------------------------------------|---------------------------------------------------------|------------------------------------------------------------------------|
| CARBON                                                 | <b>Aerobic C fixation*</b> (Calvin cycle)<br>(K00855+K01602)/2                                                                                                               | K00855                                                  | phosphoribulokinase                                                    |
|                                                        |                                                                                                                                                                              | K01602                                                  | RuBisCO small chain                                                    |
|                                                        | <b>Aerobic CH4 oxidation</b>                                                                                                                                                 | K08684                                                  | methane monooxygenase                                                  |
|                                                        | <b>Aerobic respiration</b><br>(K02256+K02262)/2+(K02274+K02276)/2                                                                                                            | K02256                                                  | cytochrome c oxidase subunit I (coxI)                                  |
|                                                        |                                                                                                                                                                              | K02262                                                  | cytochrome c oxidase subunit III (coxIII)                              |
|                                                        |                                                                                                                                                                              | K02274                                                  | cytochrome c oxidase subunit I (coxA)                                  |
|                                                        |                                                                                                                                                                              | K02276                                                  | cytochrome c oxidase subunit III (coxC)                                |
|                                                        | <b>Anaerobic C fixation</b><br>(Arnon: K00174,K00175,K00244,<br>K01648.<br>Reductive Acetil-CoA: K00194,K00197)<br><br>(K00174+K00175+K00244+<br>K01648)/4+(K00194+K00197)/2 | K00174                                                  | 2-oxoglutarate:ferredoxin oxidoreductase subunit alpha                 |
|                                                        |                                                                                                                                                                              | K00175                                                  | 2-oxoglutarate:ferredoxin oxidoreductase subunit beta                  |
|                                                        |                                                                                                                                                                              | K00244                                                  | frdA; fumarate reductase flavoprotein subunit                          |
|                                                        |                                                                                                                                                                              | K01648                                                  | adenosinetriphosphate (ATP) citrate lyase                              |
|                                                        |                                                                                                                                                                              | K00194                                                  | CO dehydrogenase subunit delta                                         |
|                                                        | <b>CO oxidation</b><br>(K03518+K03519+K03520)/3                                                                                                                              | K00197                                                  | CO dehydrogenase subunit gamma                                         |
|                                                        |                                                                                                                                                                              | K03518                                                  | CO dehydrogenase small subunit (coxS)                                  |
|                                                        |                                                                                                                                                                              | K03519                                                  | cutM, coxM; carbon-monoxide dehydrogenase medium subunit               |
| <b>Fermentation</b>                                    | K03520                                                                                                                                                                       | cutL, coxL; carbon-monoxide dehydrogenase large subunit |                                                                        |
|                                                        | K00016                                                                                                                                                                       | L-lactate dehydrogenase                                 |                                                                        |
| <b>Methanogenesis</b><br>(K00400+K00401)/2             | K00400                                                                                                                                                                       | coenzyme M methyl reductase beta subunit (mcrB)         |                                                                        |
|                                                        | K00401                                                                                                                                                                       | methyl coenzyme M reductase system, component A2        |                                                                        |
| NITROGEN                                               | <b>Ammonification</b><br>K05904+K03385                                                                                                                                       | K03385                                                  | formate-dependent nitrite reductase periplasmic cytochrome c552 (nrfA) |
|                                                        |                                                                                                                                                                              | K05904                                                  | cytochrome c nitrite reductase (nrfA)                                  |
|                                                        | <b>Anammox (SRAO)</b>                                                                                                                                                        | K10535                                                  | hydroxylamine oxidoreductase/hydrazine oxidoreductase (hao/hzo)        |
|                                                        | <b>Denitrification</b><br>(K02305+K04561+K00376)/3                                                                                                                           | K00376                                                  | nitrous oxide reductase (nosZ)                                         |
|                                                        |                                                                                                                                                                              | K02305                                                  | nitric-oxide reductase (norC)                                          |
|                                                        |                                                                                                                                                                              | K04561                                                  | nitric-oxide reductase (norB)                                          |
|                                                        | <b>Nitrate reduction + Nitrite oxidation</b> (K00370+K00371)/2                                                                                                               | K00370                                                  | nitrate reductase alpha & nitrite oxidoreductase (narG/nxrA)           |
|                                                        |                                                                                                                                                                              | K00371                                                  | nitrate reductase beta & nitrite oxidoreductase (narH/nxrB)            |
|                                                        | <b>Nitrate reduction</b><br>(K02567+K02568)/2                                                                                                                                | K02567                                                  | periplasmic nitrate reductase (napA)                                   |
|                                                        |                                                                                                                                                                              | K02568                                                  | cytochrome c-type protein (napB)                                       |
|                                                        | <b>Nitrification</b><br>(K10944+K10945+K10946)/3                                                                                                                             | K10944                                                  | ammonia monooxygenase subunit A (amoA)                                 |
|                                                        |                                                                                                                                                                              | K10945                                                  | ammonia monooxygenase subunit B (amoB)                                 |
|                                                        |                                                                                                                                                                              | K10946                                                  | ammonia monooxygenase subunit C (amoC)                                 |
|                                                        | <b>Nitrogen assimilation</b><br>(K00360+K00367+K01915+<br>K00265+K00284)/3                                                                                                   | K00265                                                  | glutamate synthase (NADPH/NADH) large chain (gltB)                     |
|                                                        |                                                                                                                                                                              | K00284                                                  | glutamate synthase (ferredoxin-dependent) (gltS)                       |
|                                                        |                                                                                                                                                                              | K00360                                                  | assimilatory nitrate reductase                                         |
|                                                        |                                                                                                                                                                              | K00367                                                  | assimilatory nitrate reductase                                         |
|                                                        |                                                                                                                                                                              | K01915                                                  | glutamine synthetase (glnA)                                            |
|                                                        | <b>Nitrogen Fixation</b><br>(K00531+K02586+K02588+<br>K02591)/4                                                                                                              | K00531                                                  | nitrogenase                                                            |
|                                                        |                                                                                                                                                                              | K02586                                                  | nitrogenase molybdenum-iron protein alpha chain (nifD)                 |
|                                                        |                                                                                                                                                                              | K02588                                                  | nitrogenase iron protein (nifH)                                        |
| K02591                                                 |                                                                                                                                                                              | nitrogenase molybdenum-iron protein beta chain (nifK)   |                                                                        |
| <b>Nitrogen Mineralization</b><br>K00260+K00261+K00262 | K00260                                                                                                                                                                       | glutamate dehydrogenase                                 |                                                                        |
|                                                        | K00261                                                                                                                                                                       | glutamate dehydrogenase                                 |                                                                        |
|                                                        | K00262                                                                                                                                                                       | glutamate dehydrogenase                                 |                                                                        |
| SULFUR                                                 | <b>Assimilatory sulfate reduction</b><br>(K00860+K00956+K00957)/3                                                                                                            | K00860                                                  | adenylylsulfate kinase (cysC)                                          |
|                                                        |                                                                                                                                                                              | K00956                                                  | sulfate adenylyltransferase subunit 1 (cysN)                           |
|                                                        |                                                                                                                                                                              | K00957                                                  | sulfate adenylyltransferase subunit 2 (cysD)                           |
|                                                        | <b>Dissimilatory sulfate reduction and sulfide oxidation**</b><br>(K00394+K00395+K11180)/3                                                                                   | K00394                                                  | adenylylsulfate reductase subunit A (aprA)                             |
|                                                        |                                                                                                                                                                              | K00395                                                  | adenylylsulfate reductase subunit B (aprB)                             |
|                                                        |                                                                                                                                                                              | K11180                                                  | sulfite reductase (dsrA)                                               |
|                                                        | <b>Sulfur Mineralization</b><br>K00456+K01011                                                                                                                                | K00456                                                  | cysteine dioxygenase                                                   |
|                                                        |                                                                                                                                                                              | K01011                                                  | 3-mercaptopyruvate sulfurtransferase                                   |
| <b>Polysulfide reduction</b>                           | K08352                                                                                                                                                                       | polysulfide reductase chain A (psrA)                    |                                                                        |

\*: *Chromatiales*: anoxygenic phototrophy through the Calvin cycle.

\*\* : As marker genes K00394, K00395, K11180 can operate in both an oxidative and a reductive way. They were assigned to the sulfate reduction or sulfide oxidation step if they had a best match within KEGG to an ortholog from a sulfate-reducing or sulfur-oxidizing clade.
