# Supplementary material for: Connecting biodiversity and potential functional role in modern euxinic environments by microbial metagenomics
Source: PubMed Central journal article supplement — ISME J. 2015 Jan 9;9(7):1648–61. doi: 10.1038/ismej.2014.254 (PMC4478705; doi:10.1038/ismej.2014.254), 2015-01-09
Supplement: ismej2014254x3.pdf [file ismej2014254x3.pdf]

| Phylum                | Order                          | Ciso-Metalimnion | Ciso-Hypolimnion | CIII-Metalimnion | CIII-Hypolimnion | average |
|-----------------------|--------------------------------|------------------|------------------|------------------|------------------|---------|
| Chlorobi              | Chlorobiales                   | 0,65             | 5,36             | 22,46            | 50,44            | 19,73   |
| Epsilonproteobacteria | Campylobacterales              | 10,97            | 12,46            | 12,61            | 20,84            | 14,22   |
| Betaproteobacteria    | Burkholderiales                | 35,27            | 9,52             | 3,91             | 0,51             | 12,30   |
| OD1                   | OD1                            | 4,30             | 13,15            | 5,80             | 8,64             | 7,97    |
| Actinobacteria        | Frankiales                     | 7,96             | 0,35             | 11,74            | 0,64             | 5,17    |
| Bacteroidetes         | Sphingobacteriales             | 4,52             | 7,09             | 4,49             | 0,25             | 4,09    |
| Actinobacteria        | Micrococcales                  | 13,12            | 1,38             | 0,14             | 0,00             | 3,66    |
| Unclassified          | Unclassified                   | 1,29             | 2,60             | 3,48             | 4,96             | 3,08    |
| Actinobacteria        | Acidimicrobiales               | 2,58             | 0,00             | 5,36             | 0,00             | 1,99    |
| Bacteroidetes         | Flavobacteriales               | 4,95             | 0,52             | 2,17             | 0,00             | 1,91    |
| Deltaproteobacteria   | Syntrophobacteriales           | 0,22             | 7,27             | 0,00             | 0,13             | 1,90    |
| Alphaproteobacteria   | SAR11                          | 0,00             | 0,00             | 6,67             | 0,13             | 1,70    |
| Betaproteobacteria    | Gallionellales                 | 0,00             | 0,00             | 2,75             | 2,54             | 1,32    |
| Firmicutes            | Clostridiales                  | 0,86             | 2,94             | 0,58             | 0,25             | 1,16    |
| OP3                   | OP3                            | 0,65             | 2,42             | 0,87             | 0,51             | 1,11    |
| Euryarchaeota         | Halobacteriales                | 0,86             | 1,90             | 0,58             | 1,02             | 1,09    |
| Betaproteobacteria    | Methylophilales                | 2,15             | 0,00             | 1,59             | 0,13             | 0,97    |
| Deltaproteobacteria   | Desulfobacterales              | 0,22             | 3,11             | 0,14             | 0,25             | 0,93    |
| Gammaproteobacteria   | Chromatiales                   | 0,22             | 3,46             | 0,00             | 0,00             | 0,92    |
| Actinobacteria        | Unresolved_Actinobacteria      | 1,72             | 0,00             | 1,45             | 0,25             | 0,86    |
| OP11                  | OP11                           | 0,22             | 2,08             | 0,29             | 0,64             | 0,80    |
| Firmicutes            | Erysipelotrichales             | 0,43             | 1,38             | 0,43             | 0,76             | 0,75    |
| Tenericutes           | Acholeplasmatales              | 0,65             | 1,90             | 0,00             | 0,13             | 0,67    |
| Tenericutes           | NB1-n                          | 0,22             | 0,69             | 0,87             | 0,89             | 0,67    |
| Betaproteobacteria    | Unresolved_Betaproteobacteria  | 0,65             | 0,17             | 1,16             | 0,38             | 0,59    |
| Chloroflexi           | SL56 marine group              | 0,00             | 0,00             | 2,32             | 0,00             | 0,58    |
| Verrucomicrobia       | vadinHA64                      | 0,00             | 0,00             | 2,32             | 0,00             | 0,58    |
| Deltaproteobacteria   | Myxococcales                   | 0,00             | 0,87             | 0,00             | 1,27             | 0,53    |
| Chloroflexi           | Anaerolineales                 | 0,22             | 1,21             | 0,29             | 0,38             | 0,52    |
| BD1-5                 | BD1-5                          | 0,22             | 1,56             | 0,14             | 0,13             | 0,51    |
| Firmicutes            | Selenomonadales                | 0,00             | 1,38             | 0,14             | 0,13             | 0,41    |
| Bacteroidetes         | Unresolved_Bacteroidetes       | 0,00             | 0,87             | 0,14             | 0,64             | 0,41    |
| Bacteroidetes         | Bacteroidales                  | 0,22             | 1,21             | 0,00             | 0,13             | 0,39    |
| Bacteroidetes         | Other_Bacteroidetes            | 0,00             | 1,38             | 0,14             | 0,00             | 0,38    |
| Lentisphaerae         | RFP12                          | 0,00             | 1,38             | 0,00             | 0,00             | 0,35    |
| Spirochaetae          | Spirochaetales                 | 0,22             | 1,04             | 0,00             | 0,13             | 0,35    |
| Cyanobacteria         | Chloroplast                    | 0,43             | 0,35             | 0,43             | 0,00             | 0,30    |
| Cyanobacteria         | Synechococcus                  | 0,00             | 0,17             | 1,01             | 0,00             | 0,30    |
| Actinobacteria        | PeM15                          | 1,08             | 0,00             | 0,00             | 0,00             | 0,27    |
| Deltaproteobacteria   | Bdellovibrionales              | 0,43             | 0,35             | 0,14             | 0,00             | 0,23    |
| SR1                   | SR1                            | 0,22             | 0,52             | 0,00             | 0,00             | 0,18    |
| Deltaproteobacteria   | Unresolved_Deltaproteobacteria | 0,00             | 0,69             | 0,00             | 0,00             | 0,17    |
| NPL-UPA2              | NPL-UPA2                       | 0,22             | 0,17             | 0,00             | 0,25             | 0,16    |
| Betaproteobacteria    | Rhodocyclales                  | 0,22             | 0,00             | 0,29             | 0,13             | 0,16    |
| Deltaproteobacteria   | Desulfarculales                | 0,00             | 0,35             | 0,00             | 0,25             | 0,15    |
| Elusimicrobia         | Elusimicrobia                  | 0,00             | 0,00             | 0,14             | 0,38             | 0,13    |
| Actinobacteria        | Gaiellales                     | 0,00             | 0,52             | 0,00             | 0,00             | 0,13    |
| Lentisphaerae         | Unresolved_Lentisphaerae       | 0,00             | 0,52             | 0,00             | 0,00             | 0,13    |
| Verrucomicrobia       | Chthoniobacterales             | 0,00             | 0,52             | 0,00             | 0,00             | 0,13    |
| TM7                   | TM7                            | 0,00             | 0,52             | 0,00             | 0,00             | 0,13    |
| Euryarchaeota         | Methanomicrobiales             | 0,00             | 0,52             | 0,00             | 0,00             | 0,13    |
| Gammaproteobacteria   | Legionellales                  | 0,22             | 0,17             | 0,00             | 0,13             | 0,13    |
| Deltaproteobacteria   | Sva0485                        | 0,00             | 0,35             | 0,14             | 0,00             | 0,12    |
| OP8                   | OP8                            | 0,00             | 0,35             | 0,14             | 0,00             | 0,12    |
| Chlorobi              | Ignavibacteriales              | 0,00             | 0,17             | 0,29             | 0,00             | 0,12    |
| Fibrobacteres         | Fibrobacteria                  | 0,00             | 0,17             | 0,14             | 0,13             | 0,11    |
| Chloroflexi           | Unresolved_Chloroflexi         | 0,00             | 0,00             | 0,43             | 0,00             | 0,11    |
| Alphaproteobacteria   | Rhodobacteriales               | 0,43             | 0,00             | 0,00             | 0,00             | 0,11    |
| Lentisphaerae         | WCHB1-41                       | 0,00             | 0,17             | 0,00             | 0,25             | 0,11    |
| Alphaproteobacteria   | Rhizobiales                    | 0,22             | 0,17             | 0,00             | 0,00             | 0,10    |
| Deltaproteobacteria   | Desulfuromonadales             | 0,00             | 0,00             | 0,00             | 0,38             | 0,10    |
| Planctomycetes        | Phycisphaerae                  | 0,00             | 0,35             | 0,00             | 0,00             | 0,09    |
| Betaproteobacteria    | Hydrogenophilales              | 0,22             | 0,00             | 0,00             | 0,13             | 0,09    |
| Lentisphaerae         | Victivallales                  | 0,00             | 0,17             | 0,14             | 0,00             | 0,08    |
| Planctomycetes        | Planctomycetales               | 0,00             | 0,17             | 0,14             | 0,00             | 0,08    |
| Fusobacteria          | Fusobacteriales                | 0,00             | 0,17             | 0,00             | 0,13             | 0,08    |
| Alphaproteobacteria   | Unresolved_Alphaproteobacteria | 0,00             | 0,00             | 0,29             | 0,00             | 0,07    |
| Gammaproteobacteria   | Pseudomonadales                | 0,00             | 0,00             | 0,29             | 0,00             | 0,07    |
| Gemmatimonadetes      | Gemmatimonadales               | 0,00             | 0,00             | 0,14             | 0,13             | 0,07    |
| Planctomycetes        | vadinHA49                      | 0,00             | 0,00             | 0,14             | 0,13             | 0,07    |
| Actinobacteria        | Propionibacteriales            | 0,22             | 0,00             | 0,00             | 0,00             | 0,05    |
| Gammaproteobacteria   | Thiotrichales                  | 0,22             | 0,00             | 0,00             | 0,00             | 0,05    |
| Bacteroidetes         | Cytophagales                   | 0,22             | 0,00             | 0,00             | 0,00             | 0,05    |
| TM6                   | TM6                            | 0,22             | 0,00             | 0,00             | 0,00             | 0,05    |
| Acidobacteria         | Unresolved_Acidobacteria       | 0,00             | 0,17             | 0,00             | 0,00             | 0,04    |
| Actinobacteria        | Corynebacteriales              | 0,00             | 0,17             | 0,00             | 0,00             | 0,04    |
| Alphaproteobacteria   | Rickettsiales                  | 0,00             | 0,17             | 0,00             | 0,00             | 0,04    |
| Deltaproteobacteria   | 43F-1404R                      | 0,00             | 0,17             | 0,00             | 0,00             | 0,04    |
| Deltaproteobacteria   | Desulfovibrionales             | 0,00             | 0,17             | 0,00             | 0,00             | 0,04    |
| Cyanobacteria         | Gastranaerophilales            | 0,00             | 0,17             | 0,00             | 0,00             | 0,04    |
| BRC1                  | BRC3                           | 0,00             | 0,17             | 0,00             | 0,00             | 0,04    |
| TA06                  | TA08                           | 0,00             | 0,17             | 0,00             | 0,00             | 0,04    |
| Euryarchaeota         | Methanobacteriales             | 0,00             | 0,17             | 0,00             | 0,00             | 0,04    |
| Euryarchaeota         | Thermoplasmatales              | 0,00             | 0,17             | 0,00             | 0,00             | 0,04    |
| Alphaproteobacteria   | Caulobacterales                | 0,00             | 0,00             | 0,14             | 0,00             | 0,04    |
| Gammaproteobacteria   | Xanthomonadales                | 0,00             | 0,00             | 0,14             | 0,00             | 0,04    |
| Verrucomicrobia       | Opitutales                     | 0,00             | 0,00             | 0,14             | 0,00             | 0,04    |
| WS6                   | WS8                            | 0,00             | 0,00             | 0,14             | 0,00             | 0,04    |
| Alphaproteobacteria   | Rhodospirillales               | 0,00             | 0,00             | 0,00             | 0,13             | 0,03    |
| Alphaproteobacteria   | Sphingomonadales               | 0,00             | 0,00             | 0,00             | 0,13             | 0,03    |
| Lentisphaerae         | MSBL3                          | 0,00             | 0,00             | 0,00             | 0,13             | 0,03    |
| Verrucomicrobia       | OPB35                          | 0,00             | 0,00             | 0,00             | 0,13             | 0,03    |
