# Supplementary material for: Connecting biodiversity and potential functional role in modern euxinic environments by microbial metagenomics
Source: PubMed Central journal article supplement — ISME J. 2015 Jan 9;9(7):1648–61. doi: 10.1038/ismej.2014.254 (PMC4478705; doi:10.1038/ismej.2014.254), 2015-01-09
Supplement: ismej2014254x4.pdf [file ismej2014254x4.pdf]

**Table S3.**

| <b>Cycle</b>    | <b>Process</b>                                      | <b>Cisó-ML<br/>%</b> | <b>Cisó-HL<br/>%</b> | <b>C-III-ML<br/>%</b> | <b>C-III-HL<br/>%</b> |
|-----------------|-----------------------------------------------------|----------------------|----------------------|-----------------------|-----------------------|
| <b>CARBON</b>   | Aerobic C fixation                                  | 5.6                  | 3.9                  | 2.0                   | 1.6                   |
|                 | Aerobic CH <sub>4</sub> oxidation                   | 7.9                  | 0.0                  | 0.8                   | 0.5                   |
|                 | Aerobic respiration                                 | 58.5                 | 20.2                 | 50.5                  | 9.0                   |
|                 | Anaerobic C fixation                                | 8.8                  | 48.0                 | 33.7                  | 82.0                  |
|                 | CO oxidation                                        | 8.0                  | 20.3                 | 12.0                  | 4.3                   |
|                 | Fermentation                                        | 11.2                 | 7.0                  | 1.0                   | 2.5                   |
|                 | Methanogenesis                                      | 0.0                  | 0.6                  | 0.0                   | 0.0                   |
| <b>NITROGEN</b> | Ammonification                                      | 1.7                  | 8.1                  | 0.5                   | 2.6                   |
|                 | Anammox (SRAO)                                      | 0.0                  | 5.5                  | 0.3                   | 0.3                   |
|                 | Denitrification                                     | 1.8                  | 2.7                  | 2.3                   | 4.6                   |
|                 | Nitrate reduction + Nitrite oxidation (NarGH/NxrAB) | 3.5                  | 5.2                  | 1.8                   | 1.5                   |
|                 | Nitrate reduction                                   | 1.8                  | 3.6                  | 2.6                   | 6.5                   |
|                 | Nitrification                                       | 0.0                  | 0.0                  | 0.0                   | 0.1                   |
|                 | Nitrogen assimilation                               | 63.6                 | 25.5                 | 42.5                  | 36.1                  |
|                 | Nitrogen Fixation                                   | 1.1                  | 10.7                 | 8.1                   | 25.8                  |
|                 | Nitrogen Mineralization                             | 26.5                 | 38.8                 | 41.9                  | 22.6                  |
| <b>SULFUR</b>   | Assimilatory sulfate reduction                      | 26.5                 | 26.9                 | 39.9                  | 18.1                  |
|                 | Sulfur Mineralization                               | 71.5                 | 18.2                 | 34.1                  | 16.8                  |
|                 | Sulfur oxidation                                    | 0.4                  | 5.6                  | 16.6                  | 41.8                  |
|                 | Dissimilatory sulfate reduction                     | 0.7                  | 15.6                 | 0.9                   | 2.7                   |
|                 | Polysulfide reduction                               | 1.0                  | 33.8                 | 8.5                   | 20.6                  |
