# Supplementary figures and images for: Connecting biodiversity and potential functional role in modern euxinic environments by microbial metagenomics
Source: PubMed Central journal article supplement — ISME J. 2015 Jan 9;9(7):1648–61. doi: 10.1038/ismej.2014.254 (PMC4478705; doi:10.1038/ismej.2014.254), 2015-01-09

# Metagenomics *phyla* (size fraction comparison of reads abundance)

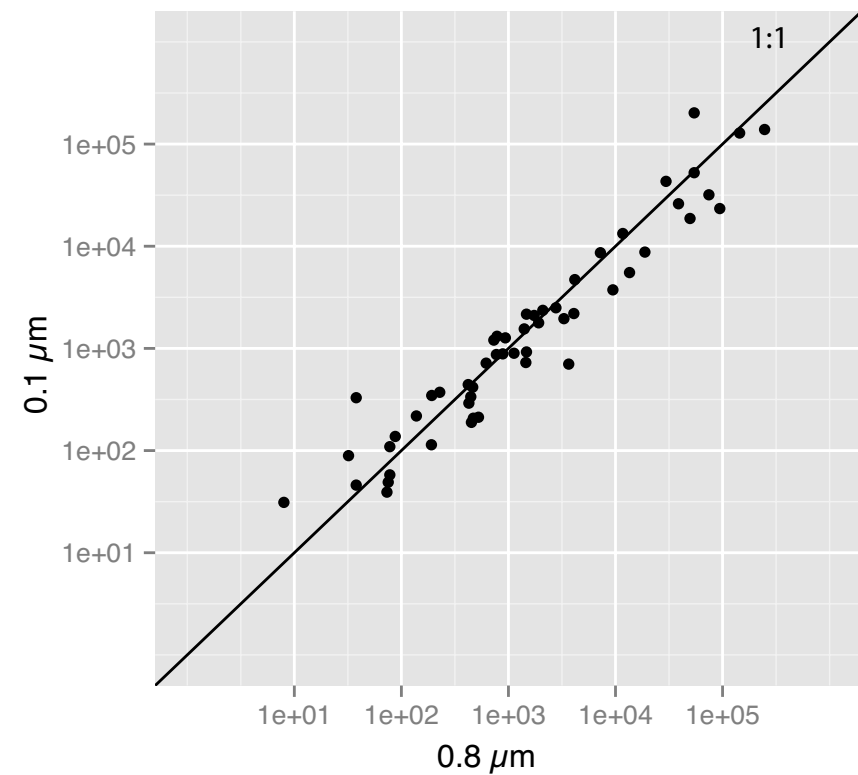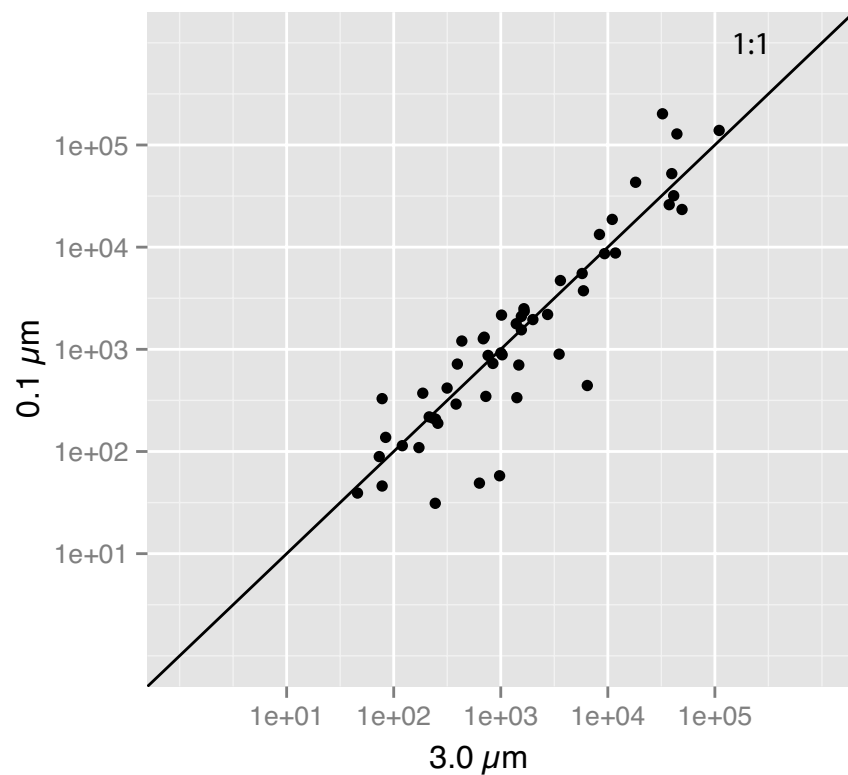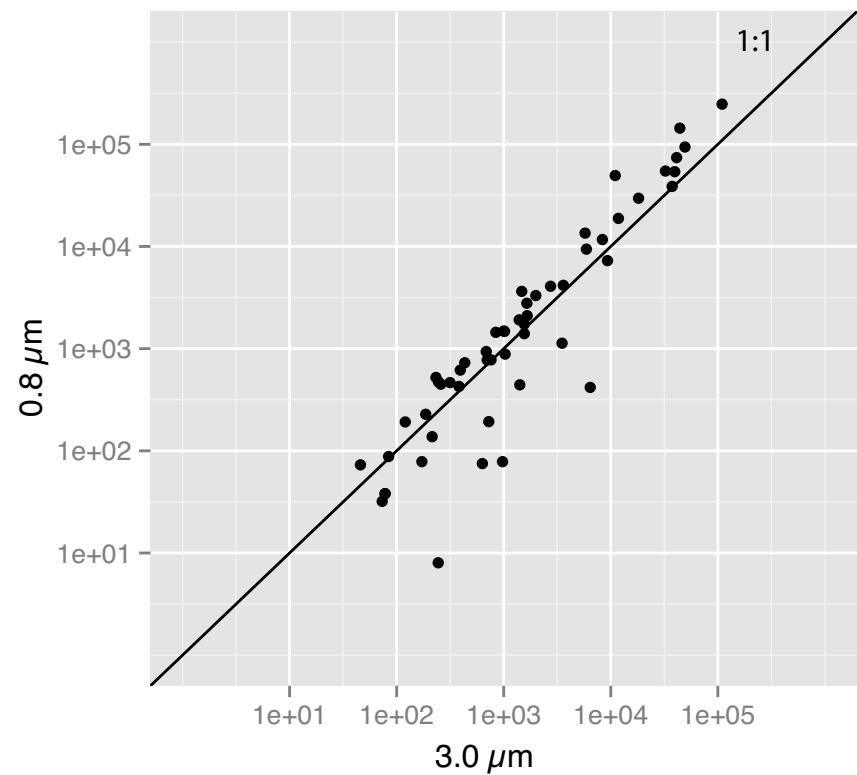

Supplement: ismej2014254x5.pdf [file ismej2014254x5.pdf]

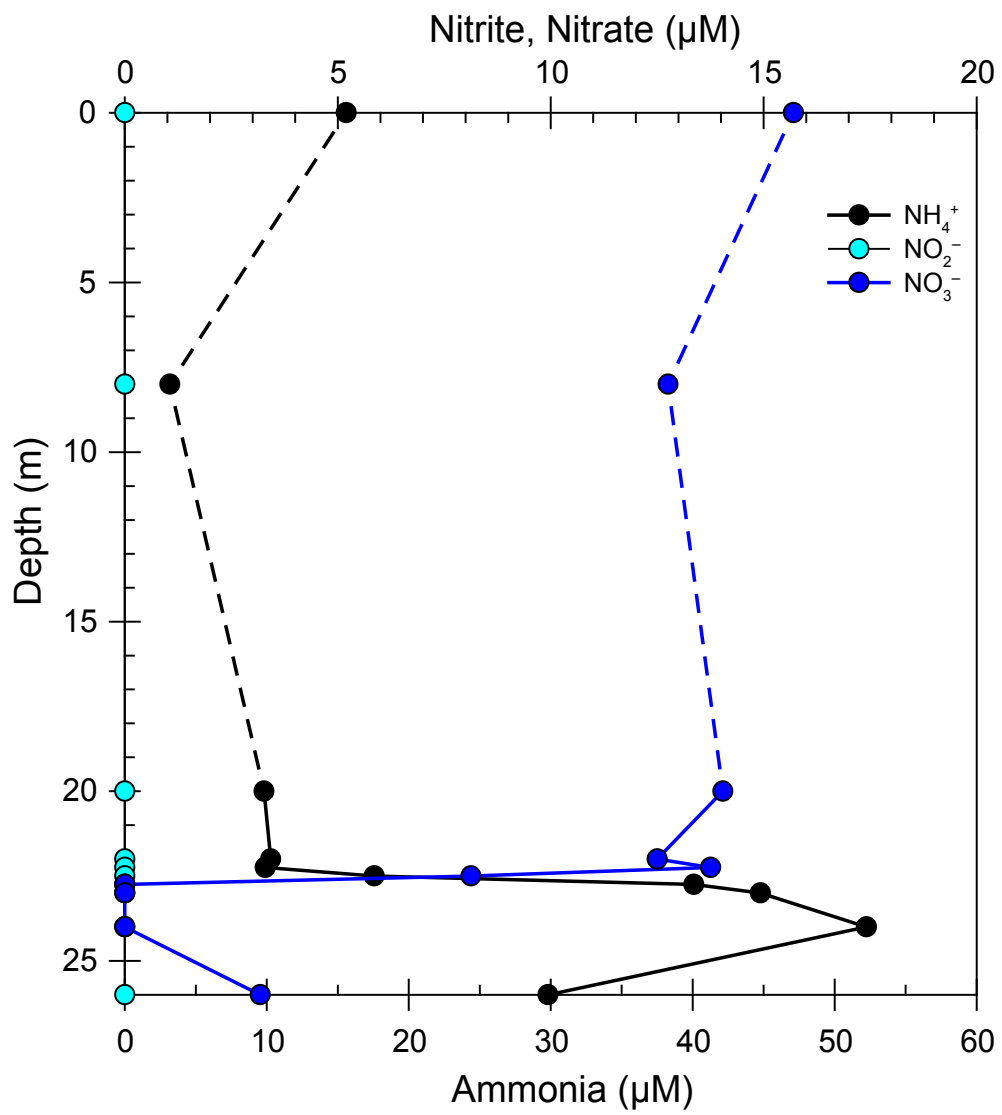

Supplement: ismej2014254x6.pdf [file ismej2014254x6.pdf]

# Euryarchaeota

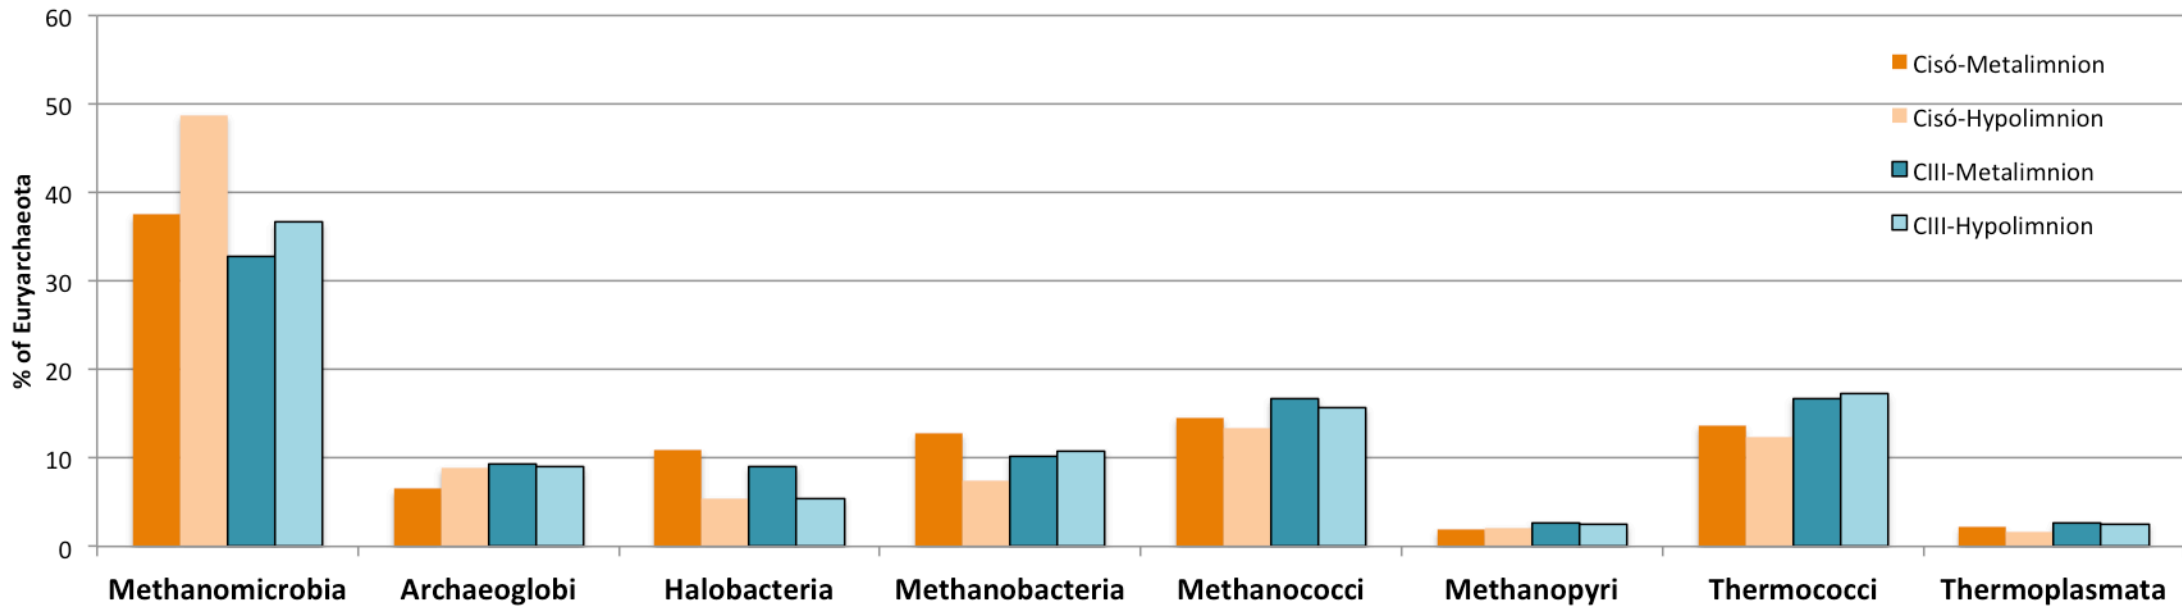

Supplement: ismej2014254x7.pdf [file ismej2014254x7.pdf]

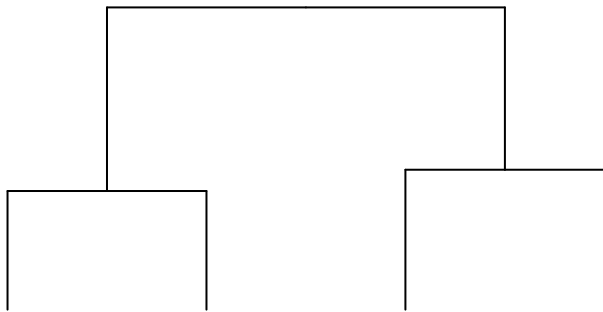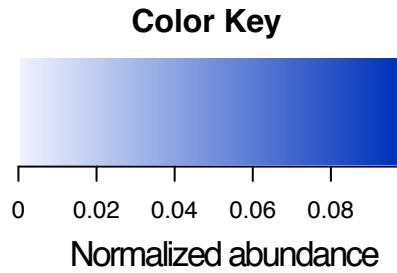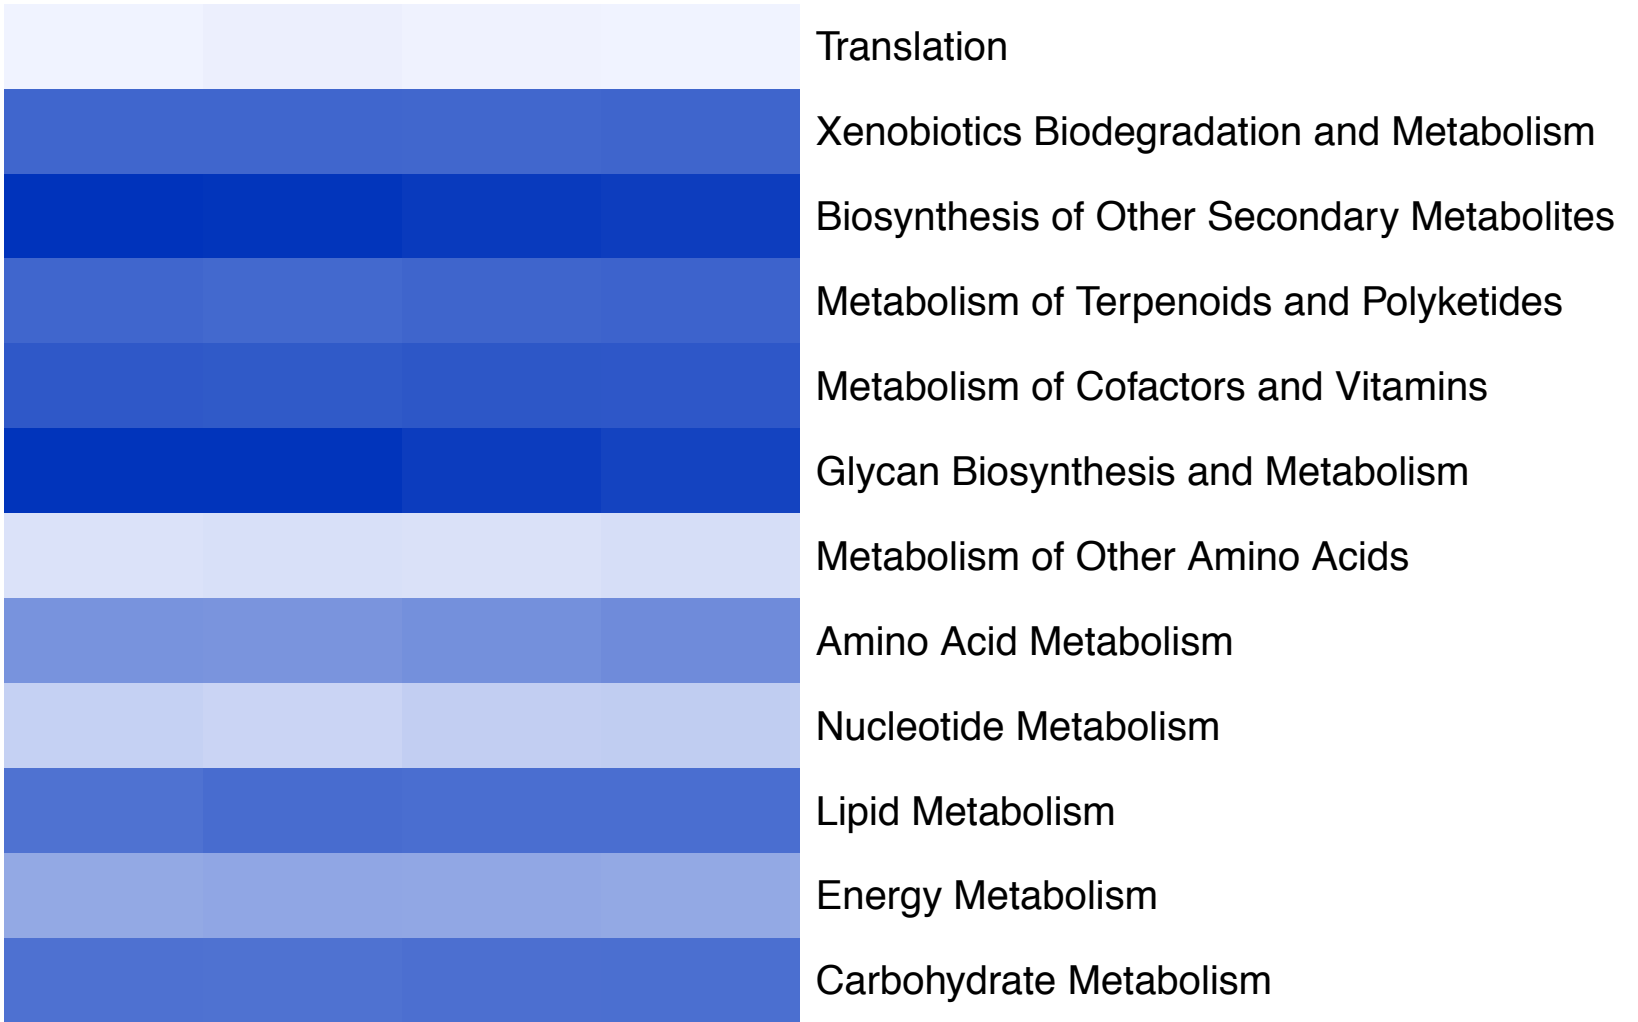

CIII Cisó CIII Cisó  
Hypolimnion Hypolimnion Metalimnion Metalimnion

Supplement: ismej2014254x8.pdf [file ismej2014254x8.pdf]
